# Supplementary material for: Looking at the big picture in activation strain model/energy decomposition analysis: the case of the ortho–para regioselectivity rule in Diels–Alder reactions
Source: Royal Society of Chemistry journal article supplement (doi:10.1039/c9ob02671a), 2020-01-01
Supplement: c9ob02671a1.pdf [file c9ob02671a1.pdf]

# Looking at the big picture in ASM/EDA analysis: the case of the *ortho-para* regioselectivity rule in Diels-Alder reactions

Nicolás Grimblat\* and Ariel M. Sarotti\*

[grimblat@iquir-conicet.gov.ar](mailto:grimblat@iquir-conicet.gov.ar)

[sarotti@iquir-conicet.gov.ar](mailto:sarotti@iquir-conicet.gov.ar)

Instituto de Química Rosario (IQUIR, CONICET-UNR) and Facultad de Ciencias Bioquímicas y Farmacéuticas, Universidad Nacional de Rosario, Suipacha 531, S2002LRK Rosario, Argentina.

## *Supporting Information*

### Table of contents

- **Table S1** D/I-ASM energies. Page S2

- **Table S2** EDA energies. Page S3

- Cartesian coordinates, energies, and number of imaginary vibrational frequencies of stationary points at M06-2X/def2-TZVPP. Page S4-S9

**Table S1**

Energies from the distortion/interaction-Activation Strain Model of the reaction of methyl acrylate with all dienes under study

| <b>1 + 2 ortho</b>                       |                          |            |                         |
|------------------------------------------|--------------------------|------------|-------------------------|
| $r(\text{C}\cdots\text{C}) / \text{\AA}$ | $\Delta E_{\text{dist}}$ | $\Delta E$ | $\Delta E_{\text{int}}$ |
| 2.19                                     | 51.75                    | 11.84      | -39.91                  |
| 2.29                                     | 28.41                    | 14.96      | -13.45                  |
| 2.33                                     | 20.54                    | 14.39      | -6.15                   |
| 2.40                                     | 15.40                    | 13.03      | -2.37                   |
| 2.47                                     | 12.05                    | 11.32      | -0.73                   |
| 2.53                                     | 9.94                     | 9.52       | -0.43                   |
| 2.60                                     | 8.68                     | 7.79       | -0.90                   |
| 2.73                                     | 7.43                     | 4.99       | -2.44                   |
| 2.95                                     | 6.57                     | 1.99       | -4.58                   |

| <b>1 + 2 meta</b>                        |                          |            |                         |
|------------------------------------------|--------------------------|------------|-------------------------|
| $r(\text{C}\cdots\text{C}) / \text{\AA}$ | $\Delta E_{\text{dist}}$ | $\Delta E$ | $\Delta E_{\text{int}}$ |
| 2.08                                     | 56.36                    | 13.77      | -42.59                  |
| 2.18                                     | 30.94                    | 17.53      | -13.41                  |
| 2.22                                     | 22.16                    | 16.92      | -5.24                   |
| 2.29                                     | 16.10                    | 15.43      | -0.66                   |
| 2.35                                     | 11.92                    | 13.47      | 1.55                    |
| 2.42                                     | 9.19                     | 11.32      | 2.13                    |
| 2.55                                     | 6.58                     | 7.28       | 0.70                    |
| 2.67                                     | 5.60                     | 4.23       | -1.36                   |
| 2.93                                     | 4.12                     | 0.23       | -3.89                   |

| <b>1 + 3 meta</b>                        |                          |            |                         |
|------------------------------------------|--------------------------|------------|-------------------------|
| $r(\text{C}\cdots\text{C}) / \text{\AA}$ | $\Delta E_{\text{dist}}$ | $\Delta E$ | $\Delta E_{\text{int}}$ |
| 2.21                                     | 49.80                    | 13.20      | -36.61                  |
| 2.32                                     | 29.93                    | 15.86      | -14.07                  |
| 2.35                                     | 22.93                    | 15.36      | -7.57                   |
| 2.42                                     | 18.18                    | 14.19      | -4.00                   |
| 2.48                                     | 14.94                    | 12.70      | -2.24                   |
| 2.55                                     | 12.76                    | 11.11      | -1.65                   |
| 2.62                                     | 11.34                    | 9.55       | -1.79                   |
| 2.74                                     | 9.93                     | 6.92       | -3.01                   |
| 2.80                                     | 9.63                     | 5.93       | -3.70                   |
| 2.97                                     | 9.10                     | 4.01       | -5.09                   |

| <b>1 + 3 para</b>                        |                          |            |                         |
|------------------------------------------|--------------------------|------------|-------------------------|
| $r(\text{C}\cdots\text{C}) / \text{\AA}$ | $\Delta E_{\text{dist}}$ | $\Delta E$ | $\Delta E_{\text{int}}$ |
| 2.11                                     | 53.78                    | 14.91      | -38.87                  |
| 2.21                                     | 29.81                    | 18.46      | -11.35                  |
| 2.28                                     | 21.49                    | 17.83      | -3.65                   |
| 2.35                                     | 15.63                    | 16.28      | 0.65                    |
| 2.42                                     | 11.49                    | 14.23      | 2.74                    |
| 2.48                                     | 8.69                     | 11.95      | 3.27                    |
| 2.55                                     | 6.88                     | 9.68       | 2.80                    |
| 2.74                                     | 4.62                     | 4.34       | -0.28                   |
| 2.85                                     | 4.13                     | 2.19       | -1.94                   |
| 3.02                                     | 3.74                     | 0.45       | -3.28                   |

| <b>1 + 4 ortho/para</b>                  |                          |            |                         |
|------------------------------------------|--------------------------|------------|-------------------------|
| $r(\text{C}\cdots\text{C}) / \text{\AA}$ | $\Delta E_{\text{dist}}$ | $\Delta E$ | $\Delta E_{\text{int}}$ |
| 2.18                                     | 59.09                    | 6.13       | -52.96                  |
| 2.22                                     | 53.13                    | 8.71       | -44.42                  |
| 2.39                                     | 27.08                    | 11.56      | -15.52                  |
| 2.46                                     | 20.42                    | 11.10      | -9.33                   |
| 2.53                                     | 16.15                    | 10.03      | -6.13                   |
| 2.59                                     | 13.41                    | 8.71       | -4.70                   |
| 2.66                                     | 11.68                    | 7.33       | -4.35                   |
| 2.72                                     | 10.65                    | 6.02       | -4.63                   |
| 2.78                                     | 10.01                    | 4.86       | -5.16                   |
| 2.90                                     | 9.29                     | 3.11       | -6.19                   |

| <b>1 + 4 meta/meta</b>                   |                          |            |                         |
|------------------------------------------|--------------------------|------------|-------------------------|
| $r(\text{C}\cdots\text{C}) / \text{\AA}$ | $\Delta E_{\text{dist}}$ | $\Delta E$ | $\Delta E_{\text{int}}$ |
| 2.06                                     | 57.95                    | 13.45      | -44.50                  |
| 2.20                                     | 32.89                    | 17.25      | -15.64                  |
| 2.27                                     | 24.40                    | 16.62      | -7.78                   |
| 2.34                                     | 18.54                    | 15.12      | -3.43                   |
| 2.41                                     | 14.54                    | 13.14      | -1.40                   |
| 2.47                                     | 11.97                    | 11.00      | -0.98                   |
| 2.54                                     | 10.47                    | 8.92       | -1.55                   |
| 2.61                                     | 9.63                     | 7.06       | -2.57                   |
| 2.73                                     | 8.82                     | 4.15       | -4.66                   |
| 2.89                                     | 8.07                     | 1.51       | -6.55                   |

| <b>1 + 5 ortho/meta</b>                  |                          |            |                         |
|------------------------------------------|--------------------------|------------|-------------------------|
| $r(\text{C}\cdots\text{C}) / \text{\AA}$ | $\Delta E_{\text{dist}}$ | $\Delta E$ | $\Delta E_{\text{int}}$ |
| 2.21                                     | 40.70                    | 7.02       | -33.68                  |
| 2.25                                     | 34.55                    | 7.03       | -27.52                  |
| 2.32                                     | 24.57                    | 7.77       | -16.80                  |
| 2.35                                     | 17.15                    | 7.24       | -9.91                   |
| 2.42                                     | 12.31                    | 5.97       | -6.34                   |
| 2.49                                     | 9.15                     | 4.33       | -4.82                   |
| 2.56                                     | 7.20                     | 2.61       | -4.59                   |
| 2.63                                     | 6.06                     | 1.01       | -5.05                   |
| 2.69                                     | 5.38                     | -0.37      | -5.76                   |
| 2.93                                     | 4.30                     | -3.68      | -7.98                   |

| <b>1 + 5 meta/para</b>                   |                          |            |                         |
|------------------------------------------|--------------------------|------------|-------------------------|
| $r(\text{C}\cdots\text{C}) / \text{\AA}$ | $\Delta E_{\text{dist}}$ | $\Delta E$ | $\Delta E_{\text{int}}$ |
| 2.23                                     | 35.09                    | 9.22       | -25.87                  |
| 2.26                                     | 25.57                    | 9.87       | -15.71                  |
| 2.30                                     | 18.30                    | 9.40       | -8.90                   |
| 2.37                                     | 13.25                    | 8.27       | -4.98                   |
| 2.43                                     | 9.85                     | 6.81       | -3.04                   |
| 2.50                                     | 7.68                     | 5.25       | -2.43                   |
| 2.57                                     | 6.37                     | 3.77       | -2.60                   |
| 2.69                                     | 5.12                     | 1.36       | -3.76                   |
| 2.80                                     | 4.51                     | -0.34      | -4.85                   |
| 2.94                                     | 3.66                     | -1.95      | -5.61                   |

**Table S2**

Energies from the Energy Decomposition Analysis of the reaction of methyl acrylate with all dienes under study

| 1 + 2 <i>ortho</i>                       |                         |                           |                            |                        |
|------------------------------------------|-------------------------|---------------------------|----------------------------|------------------------|
| $r(\text{C}\cdots\text{C}) / \text{\AA}$ | $\Delta E_{\text{int}}$ | $\Delta E_{\text{Pauli}}$ | $\Delta E_{\text{elstat}}$ | $\Delta E_{\text{oi}}$ |
| 2.19                                     | -39.87                  | 153.4                     | -79.46                     | -113.81                |
| 2.29                                     | -13.13                  | 98.7                      | -52                        | -59.83                 |
| 2.33                                     | -5.81                   | 79.62                     | -42.48                     | -42.95                 |
| 2.40                                     | -2.12                   | 64.11                     | -35.07                     | -31.16                 |
| 2.47                                     | -0.44                   | 51.86                     | -29.16                     | -23.14                 |
| 2.53                                     | -0.24                   | 41.93                     | -24.58                     | -17.59                 |
| 2.60                                     | -0.66                   | 34.19                     | -20.86                     | -13.99                 |
| 2.73                                     | -2.3                    | 22.87                     | -15.61                     | -9.56                  |
| 2.95                                     | -4.43                   | 11.19                     | -9.87                      | -5.75                  |

| 1 + 2 <i>meta</i>                        |                         |                           |                            |                        |
|------------------------------------------|-------------------------|---------------------------|----------------------------|------------------------|
| $r(\text{C}\cdots\text{C}) / \text{\AA}$ | $\Delta E_{\text{int}}$ | $\Delta E_{\text{Pauli}}$ | $\Delta E_{\text{elstat}}$ | $\Delta E_{\text{oi}}$ |
| 2.08                                     | -45.68                  | 145.19                    | -75.9                      | -114.97                |
| 2.18                                     | -13.12                  | 103.26                    | -54.11                     | -62.27                 |
| 2.22                                     | -4.94                   | 86.62                     | -45.71                     | -45.85                 |
| 2.29                                     | -0.36                   | 72.17                     | -38.66                     | -33.87                 |
| 2.35                                     | 1.8                     | 60.34                     | -32.97                     | -25.57                 |
| 2.42                                     | 2.34                    | 50.01                     | -28.11                     | -19.56                 |
| 2.55                                     | 0.85                    | 34.46                     | -20.84                     | -12.77                 |
| 2.67                                     | -1.21                   | 23.66                     | -15.8                      | -9.07                  |
| 2.93                                     | -3.75                   | 10.09                     | -8.89                      | -4.95                  |

| 1 + 3 <i>meta</i>                        |                         |                           |                            |                        |
|------------------------------------------|-------------------------|---------------------------|----------------------------|------------------------|
| $r(\text{C}\cdots\text{C}) / \text{\AA}$ | $\Delta E_{\text{int}}$ | $\Delta E_{\text{Pauli}}$ | $\Delta E_{\text{elstat}}$ | $\Delta E_{\text{oi}}$ |
| 2.21                                     | -40.91                  | 149.92                    | -77.57                     | -113.26                |
| 2.31                                     | -11.08                  | 104.9                     | -54.21                     | -61.77                 |
| 2.35                                     | -3.39                   | 87.62                     | -45.57                     | -45.44                 |
| 2.42                                     | 0.86                    | 73.11                     | -38.85                     | -33.4                  |
| 2.48                                     | 2.95                    | 60.98                     | -32.65                     | -25.38                 |
| 2.55                                     | 3.4                     | 50.73                     | -28.13                     | -19.2                  |
| 2.61                                     | 2.94                    | 42.26                     | -23.83                     | -15.49                 |
| 2.74                                     | -0.14                   | 24.11                     | -15.51                     | -8.74                  |
| 2.80                                     | -1.76                   | 16.63                     | -11.55                     | -6.84                  |
| 2.97                                     | -3.11                   | 9.51                      | -7.97                      | -4.65                  |

| 1 + 3 <i>para</i>                        |                         |                           |                            |                        |
|------------------------------------------|-------------------------|---------------------------|----------------------------|------------------------|
| $r(\text{C}\cdots\text{C}) / \text{\AA}$ | $\Delta E_{\text{int}}$ | $\Delta E_{\text{Pauli}}$ | $\Delta E_{\text{elstat}}$ | $\Delta E_{\text{oi}}$ |
| 2.11                                     | -36.97                  | 150.73                    | -80.64                     | -107.06                |
| 2.21                                     | -13.75                  | 100.45                    | -55.13                     | -59.07                 |
| 2.28                                     | -7.3                    | 82.18                     | -45.72                     | -43.76                 |
| 2.35                                     | -3.74                   | 67.18                     | -38.46                     | -32.46                 |
| 2.42                                     | -1.98                   | 55.19                     | -32.42                     | -24.75                 |
| 2.48                                     | -1.46                   | 45.26                     | -27.83                     | -18.89                 |
| 2.55                                     | -1.56                   | 37.36                     | -23.79                     | -15.13                 |
| 2.74                                     | -2.81                   | 25.46                     | -18.17                     | -10.1                  |
| 2.85                                     | -3.46                   | 21.28                     | -15.9                      | -8.84                  |
| 3.02                                     | -4.91                   | 12.57                     | -11.53                     | -5.95                  |

| 1 + 4 <i>ortho/para</i>                  |                         |                           |                            |                        |
|------------------------------------------|-------------------------|---------------------------|----------------------------|------------------------|
| $r(\text{C}\cdots\text{C}) / \text{\AA}$ | $\Delta E_{\text{int}}$ | $\Delta E_{\text{Pauli}}$ | $\Delta E_{\text{elstat}}$ | $\Delta E_{\text{oi}}$ |
| 2.18                                     | -52.52                  | 210.21                    | -111.32                    | -151.41                |
| 2.22                                     | -44.96                  | 186.08                    | -99.31                     | -131.73                |
| 2.39                                     | -15.19                  | 99.88                     | -56.05                     | -59.02                 |
| 2.46                                     | -8.98                   | 78.27                     | -45                        | -42.25                 |
| 2.53                                     | -5.82                   | 61.74                     | -36.8                      | -30.76                 |
| 2.59                                     | -4.44                   | 49.06                     | -30.58                     | -22.92                 |
| 2.66                                     | -4.21                   | 39.22                     | -25.9                      | -17.53                 |
| 2.72                                     | -4.42                   | 31.76                     | -22.13                     | -14.05                 |
| 2.78                                     | -5.02                   | 25.85                     | -19.33                     | -11.54                 |
| 2.90                                     | -6.02                   | 17.94                     | -15.33                     | -8.63                  |

| 1 + 4 <i>meta/meta</i>                   |                         |                           |                            |                        |
|------------------------------------------|-------------------------|---------------------------|----------------------------|------------------------|
| $r(\text{C}\cdots\text{C}) / \text{\AA}$ | $\Delta E_{\text{int}}$ | $\Delta E_{\text{Pauli}}$ | $\Delta E_{\text{elstat}}$ | $\Delta E_{\text{oi}}$ |
| 2.06                                     | -44.47                  | 145.83                    | -79.46                     | -110.84                |
| 2.20                                     | -15.29                  | 103.59                    | -57.21                     | -61.67                 |
| 2.27                                     | -7.44                   | 86.64                     | -48.76                     | -45.32                 |
| 2.34                                     | -3.08                   | 72.65                     | -41.68                     | -34.05                 |
| 2.41                                     | -1.11                   | 60.61                     | -35.84                     | -25.88                 |
| 2.47                                     | -0.76                   | 50.23                     | -31.04                     | -19.95                 |
| 2.54                                     | -1.35                   | 41.91                     | -26.97                     | -16.29                 |
| 2.61                                     | -2.38                   | 34.61                     | -23.65                     | -13.34                 |
| 2.73                                     | -4.44                   | 24.14                     | -18.53                     | -10.05                 |
| 2.89                                     | -6.35                   | 14.57                     | -13.87                     | -7.05                  |

| 1 + 5 <i>ortho/meta</i>                  |                         |                           |                            |                        |
|------------------------------------------|-------------------------|---------------------------|----------------------------|------------------------|
| $r(\text{C}\cdots\text{C}) / \text{\AA}$ | $\Delta E_{\text{int}}$ | $\Delta E_{\text{Pauli}}$ | $\Delta E_{\text{elstat}}$ | $\Delta E_{\text{oi}}$ |
| 2.21                                     | -34.08                  | 128.48                    | -70.3                      | -92.26                 |
| 2.25                                     | -26.94                  | 115                       | -63.42                     | -78.52                 |
| 2.32                                     | -16.21                  | 92.48                     | -52.06                     | -56.63                 |
| 2.35                                     | -9.38                   | 74.67                     | -43.22                     | -40.83                 |
| 2.42                                     | -5.82                   | 60.57                     | -36.36                     | -30.03                 |
| 2.49                                     | -4.32                   | 49.31                     | -30.98                     | -22.65                 |
| 2.56                                     | -4.1                    | 40.36                     | -26.73                     | -17.73                 |
| 2.63                                     | -4.6                    | 33.24                     | -23.38                     | -14.46                 |
| 2.69                                     | -5.33                   | 27.55                     | -20.69                     | -12.19                 |
| 2.93                                     | -7.58                   | 14.04                     | -14.11                     | -7.51                  |

| 1 + 5 <i>meta/para</i>                   |                         |                           |                            |                        |
|------------------------------------------|-------------------------|---------------------------|----------------------------|------------------------|
| $r(\text{C}\cdots\text{C}) / \text{\AA}$ | $\Delta E_{\text{int}}$ | $\Delta E_{\text{Pauli}}$ | $\Delta E_{\text{elstat}}$ | $\Delta E_{\text{oi}}$ |
| 2.23                                     | -25.48                  | 115.24                    | -63.21                     | -77.51                 |
| 2.26                                     | -15.31                  | 95.59                     | -52.93                     | -57.97                 |
| 2.30                                     | -8.51                   | 79.33                     | -44.56                     | -43.28                 |
| 2.37                                     | -4.62                   | 66                        | -37.83                     | -32.79                 |
| 2.43                                     | -2.72                   | 54.9                      | -32.33                     | -25.29                 |
| 2.50                                     | -2.13                   | 45.61                     | -27.78                     | -19.96                 |
| 2.57                                     | -2.33                   | 37.86                     | -24.02                     | -16.17                 |
| 2.69                                     | -3.54                   | 26.26                     | -18.36                     | -11.44                 |
| 2.80                                     | -4.65                   | 18.91                     | -14.65                     | -8.91                  |
| 2.94                                     | -5.39                   | 12.58                     | -11.2                      | -6.77                  |

**Table S3**

Cartesian coordinates (Å), energies (Hartree), and imaginary vibrational frequencies of the optimized structures.

**1**

M062X/def2TZVPP geometry

|   |           |           |           |
|---|-----------|-----------|-----------|
| C | 1.317365  | -0.647473 | -0.000001 |
| C | 0.039941  | 0.110015  | 0.000000  |
| C | 2.472189  | -0.001035 | -0.000001 |
| O | -0.061812 | 1.306908  | 0.000001  |
| O | -1.012436 | -0.720373 | 0.000000  |
| C | -2.286515 | -0.081954 | 0.000001  |
| H | 1.247306  | -1.726352 | -0.000001 |
| H | 3.415898  | -0.528214 | -0.000002 |
| H | 2.485943  | 1.081482  | 0.000000  |
| H | -3.021300 | -0.880388 | 0.000001  |
| H | -2.395867 | 0.541933  | 0.885418  |
| H | -2.395868 | 0.541934  | -0.885415 |

Number of imaginary frequencies = 0

ZPE Energy (M062X/def2TZVPP) = -306.367305

Free Energy (M062X/def2TZVPP) = -306.398155

**2**

M062X/def2TZVPP geometry

|   |           |           |           |
|---|-----------|-----------|-----------|
| C | 0.436647  | 0.091518  | -0.000005 |
| C | 1.824804  | -0.339049 | -0.000003 |
| C | 2.872048  | 0.481899  | 0.000004  |
| C | -0.563134 | -0.796114 | 0.000000  |
| H | 1.994061  | -1.411960 | -0.000006 |
| H | 3.884419  | 0.104696  | 0.000006  |
| H | 2.742802  | 1.557277  | 0.000008  |
| O | -1.884815 | -0.552904 | 0.000004  |
| C | -2.277994 | 0.802199  | -0.000001 |
| H | 0.243515  | 1.156484  | -0.000007 |
| H | -0.368592 | -1.861990 | 0.000002  |
| H | -3.363667 | 0.809871  | 0.000009  |
| H | -1.904116 | 1.313073  | 0.890732  |
| H | -1.904134 | 1.313063  | -0.890746 |

Number of imaginary frequencies = 0

ZPE Energy (M062X/def2TZVPP) = -270.380553

Free Energy (M062X/def2TZVPP) = -270.410859

**3**

M062X/def2TZVPP geometry

|   |           |           |           |
|---|-----------|-----------|-----------|
| C | -2.166565 | -0.768170 | 0.000224  |
| C | -1.485347 | 0.370292  | -0.000256 |
| C | -0.020695 | 0.455844  | -0.000056 |
| C | 0.618848  | 1.629826  | 0.000186  |
| O | 0.572865  | -0.759578 | -0.000148 |
| C | 1.981025  | -0.786511 | -0.000006 |
| H | -3.247297 | -0.768988 | 0.000082  |
| H | -1.658427 | -1.722345 | 0.000648  |
| H | -2.000013 | 1.323044  | -0.000744 |
| H | 1.692707  | 1.723299  | 0.000298  |
| H | 0.035476  | 2.537174  | 0.000274  |
| H | 2.269752  | -1.833600 | 0.000134  |
| H | 2.380728  | -0.294931 | -0.890494 |
| H | 2.380555  | -0.294713 | 0.890438  |

Number of imaginary frequencies = 0

ZPE Energy (M062X/def2TZVPP) = -270.382389

Free Energy (M062X/def2TZVPP) = -270.412513

**4**

M062X/def2TZVPP geometry

|   |           |           |           |
|---|-----------|-----------|-----------|
| C | 1.473231  | 1.476088  | 0.306370  |
| C | 1.013107  | 0.235613  | 0.118907  |
| C | -0.401713 | -0.153250 | 0.154489  |
| C | -1.364655 | 0.641569  | -0.312711 |
| O | 1.788643  | -0.854720 | -0.119022 |
| C | 3.182601  | -0.657836 | -0.140232 |
| O | -2.687416 | 0.406232  | -0.319265 |
| C | -3.115711 | -0.814578 | 0.244449  |
| H | 2.516426  | 1.734266  | 0.223897  |
| H | 0.779534  | 2.260944  | 0.561284  |
| H | -0.610419 | -1.141383 | 0.540334  |
| H | -1.139200 | 1.601221  | -0.760692 |
| H | 3.630669  | -1.635011 | -0.296867 |
| H | 3.470761  | 0.011843  | -0.954370 |
| H | 3.531245  | -0.238231 | 0.806969  |
| H | -4.198731 | -0.827870 | 0.168753  |
| H | -2.814840 | -0.881612 | 1.292880  |
| H | -2.696422 | -1.661895 | -0.303523 |

Number of imaginary frequencies = 0

ZPE Energy (M062X/def2TZVPP) = -384.874500

Free Energy (M062X/def2TZVPP) = -384.908337

**5**

M062X/def2TZVPP geometry

|   |           |           |           |
|---|-----------|-----------|-----------|
| C | -1.829080 | 2.018189  | -0.319027 |
| C | -1.594596 | 0.928603  | 0.404609  |
| C | -0.441309 | 0.036382  | 0.250123  |
| C | 0.786569  | 0.490368  | -0.013552 |
| O | 1.837156  | -0.331960 | -0.223976 |
| C | 3.096249  | 0.252915  | 0.033910  |
| H | -2.669316 | 2.663759  | -0.103985 |
| H | -1.187042 | 2.292037  | -1.146736 |
| H | -2.287411 | 0.642675  | 1.191502  |
| H | 0.975763  | 1.557823  | -0.060871 |
| H | 3.849698  | -0.478096 | -0.246312 |
| H | 3.203836  | 0.497887  | 1.093161  |
| H | 3.234420  | 1.160674  | -0.560843 |
| O | -0.644186 | -1.298089 | 0.480747  |
| C | -1.563047 | -1.905170 | -0.409176 |
| H | -2.544947 | -1.427214 | -0.356711 |
| H | -1.195953 | -1.851101 | -1.437099 |
| H | -1.651523 | -2.945767 | -0.107604 |

Number of imaginary frequencies = 0

ZPE Energy (M062X/def2TZVPP) = -384.859446

Free Energy (M062X/def2TZVPP) = -384.895521

**TS-1+2-MN**

M062X/def2TZVPP geometry

|   |           |          |           |
|---|-----------|----------|-----------|
| C | -1.404657 | 0.769814 | -0.947683 |
| C | -0.212905 | 1.489411 | -1.001277 |
| C | 0.403344  | 1.975037 | 0.128434  |
| C | -2.046713 | 0.538377 | 0.260458  |

|   |           |           |           |
|---|-----------|-----------|-----------|
| O | -3.154161 | -0.231014 | 0.406680  |
| C | -3.398990 | -1.190925 | -0.599292 |
| H | -1.708950 | 0.220713  | -1.827519 |
| H | 0.346091  | 1.462612  | -1.928009 |
| H | -0.169709 | 2.272163  | 0.994637  |
| H | 1.389630  | 2.414646  | 0.060589  |
| H | -2.012995 | 1.286964  | 1.039105  |
| H | -2.497928 | -1.772707 | -0.812573 |
| H | -3.742545 | -0.715829 | -1.521133 |
| H | -4.178160 | -1.845456 | -0.219391 |
| C | 0.683530  | 0.046068  | 1.234005  |
| C | -0.565955 | -0.541758 | 1.335083  |
| C | 1.604640  | -0.496294 | 0.224835  |
| O | 2.872268  | -0.081627 | 0.408225  |
| O | 1.277603  | -1.218347 | -0.684536 |
| C | 3.806828  | -0.553561 | -0.555008 |
| H | 1.127461  | 0.588143  | 2.055437  |
| H | -0.750420 | -1.434054 | 0.753887  |
| H | -1.123559 | -0.447862 | 2.256021  |
| H | 4.770551  | -0.149941 | -0.260284 |
| H | 3.834321  | -1.641955 | -0.559792 |
| H | 3.535785  | -0.206544 | -1.551252 |

Number of imaginary frequencies = 1 (-536.9257)  
 ZPE Energy (M062X/def2TZVPP) = -576.716673  
 Free Energy (M062X/def2TZVPP) = -576.756074

### TS-1+2-ON

M062X/def2TZVPP geometry

|   |           |           |           |
|---|-----------|-----------|-----------|
| C | -2.298583 | 0.211059  | -1.058113 |
| C | -1.074626 | 0.854602  | -1.246695 |
| C | -0.383308 | 1.416030  | -0.208635 |
| C | -2.911883 | 0.091467  | 0.175713  |
| O | 0.857330  | 1.880315  | -0.410637 |
| C | 1.517962  | 2.368451  | 0.742449  |
| H | -2.677464 | -0.380559 | -1.882272 |
| H | -0.557535 | 0.753935  | -2.191838 |
| H | -0.854275 | 1.710289  | 0.721047  |
| H | -3.852681 | -0.438841 | 0.238905  |
| H | -2.795408 | 0.875702  | 0.911451  |
| H | 1.699098  | 1.554124  | 1.445441  |
| H | 0.928505  | 3.154920  | 1.219923  |
| H | 2.466641  | 2.779640  | 0.410112  |
| C | -0.362097 | -0.703753 | 1.194675  |
| C | -1.666648 | -1.167063 | 1.193747  |
| C | 0.565024  | -1.220882 | 0.201892  |
| O | 1.836122  | -0.814421 | 0.431389  |
| O | 0.267447  | -1.920548 | -0.739229 |
| C | 2.776881  | -1.194221 | -0.563433 |
| H | 0.044416  | -0.140469 | 2.021861  |
| H | -1.879426 | -2.030819 | 0.579773  |
| H | -2.243639 | -1.087987 | 2.105564  |
| H | 3.738005  | -0.814081 | -0.229416 |
| H | 2.811698  | -2.277294 | -0.668259 |
| H | 2.508542  | -0.755477 | -1.524084 |

Number of imaginary frequencies = 1 (-479.7328)  
 ZPE Energy (M062X/def2TZVPP) = -576.721151  
 Free Energy (M062X/def2TZVPP) = -576.760211

### TS-1+3-MN

M062X/def2TZVPP geometry

|   |           |           |           |
|---|-----------|-----------|-----------|
| C | 2.218372  | -0.365448 | -0.536779 |
| C | 1.231446  | -1.047512 | 0.189690  |
| C | 0.745496  | -0.524195 | 1.364455  |
| C | 2.726312  | 0.841201  | -0.105854 |
| H | 3.429889  | 1.363344  | -0.740678 |
| H | 2.374756  | -0.689106 | -1.557948 |
| O | 0.668797  | -2.093350 | -0.471379 |
| H | 1.391856  | 0.091057  | 1.965833  |
| H | -0.105618 | -0.947814 | 1.875715  |
| H | 2.857723  | 1.027319  | 0.950577  |
| C | -0.473609 | -2.679862 | 0.100008  |
| H | -1.283222 | -1.950388 | 0.191754  |
| H | -0.255423 | -3.099338 | 1.086409  |
| H | -0.780767 | -3.475212 | -0.573105 |
| C | 0.046932  | 1.581647  | 0.580216  |
| C | 1.104600  | 2.127074  | -0.128180 |
| C | -1.027686 | 0.932447  | -0.174884 |
| O | -2.143015 | 0.750533  | 0.566085  |
| O | -0.950840 | 0.588756  | -1.329123 |
| C | -3.256629 | 0.217102  | -0.139537 |
| H | -0.176170 | 1.878426  | 1.593881  |
| H | 1.020297  | 2.144170  | -1.205095 |
| H | 1.661531  | 2.938142  | 0.320569  |
| H | -3.573433 | 0.903349  | -0.924022 |
| H | -3.006724 | -0.738081 | -0.598983 |
| H | -4.045636 | 0.091893  | 0.595631  |

Number of imaginary frequencies = 1 (-538.5433)  
 ZPE Energy (M062X/def2TZVPP) = -576.716979  
 Free Energy (M062X/def2TZVPP) = -576.755566

### TS-1+3-PN

M062X/def2TZVPP geometry

|   |           |           |           |
|---|-----------|-----------|-----------|
| C | 1.836227  | 0.095528  | 0.335586  |
| C | 0.893263  | -0.180249 | 1.359490  |
| C | 0.105445  | 0.793450  | 1.876099  |
| C | 2.030847  | 1.383905  | -0.128209 |
| H | 2.760569  | 1.519733  | -0.914526 |
| O | 2.427782  | -0.879299 | -0.379773 |
| H | 0.655941  | -1.210321 | 1.583450  |
| H | 0.338586  | 1.841605  | 1.787809  |
| H | -0.701690 | 0.541730  | 2.550652  |
| H | 1.920198  | 2.205466  | 0.560497  |
| C | -0.852641 | 1.519919  | -0.410789 |
| C | 0.296015  | 1.742162  | -1.151929 |
| C | -1.444250 | 0.200084  | -0.459411 |
| O | -2.666499 | 0.139892  | 0.113244  |
| O | -0.910526 | -0.779087 | -0.944589 |
| C | -3.265379 | -1.147125 | 0.124639  |
| H | -1.403753 | 2.315200  | 0.066905  |
| H | 0.536851  | 1.012530  | -1.914307 |
| H | 0.572254  | 2.764170  | -1.376440 |
| H | -3.360846 | -1.538927 | -0.886738 |
| H | -2.666561 | -1.843357 | 0.712230  |
| H | -4.244591 | -1.019456 | 0.576515  |
| C | 1.945335  | -2.207765 | -0.263293 |
| H | 0.872624  | -2.238379 | -0.461641 |
| H | 2.163728  | -2.619182 | 0.724488  |
| H | 2.481455  | -2.782306 | -1.013058 |

Number of imaginary frequencies = 1 (-464.1776)  
ZPE Energy (M062X/def2TZVPP) = -576.721224  
Free Energy (M062X/def2TZVPP) = -576.759828

### TS-1+4-MMN

M062X/def2TZVPP geometry

|   |           |           |           |
|---|-----------|-----------|-----------|
| C | -1.106479 | 1.185860  | 0.070100  |
| C | 0.069506  | 1.168031  | 0.826096  |
| C | 0.285227  | 0.207788  | 1.790750  |
| C | -2.094490 | 0.240230  | 0.261490  |
| O | -3.163942 | 0.277998  | -0.571791 |
| H | -1.184558 | 1.789917  | -0.821986 |
| O | 1.153620  | 1.928720  | 0.507645  |
| H | -0.544832 | -0.204724 | 2.339646  |
| H | 1.256642  | 0.153146  | 2.261526  |
| H | -2.288749 | -0.187060 | 1.238744  |
| C | 1.125974  | 2.662112  | -0.699470 |
| H | 0.352939  | 3.434371  | -0.673172 |
| H | 0.967464  | 1.999793  | -1.552144 |
| H | 2.099211  | 3.138699  | -0.783037 |
| C | 0.186133  | -1.612882 | 0.443870  |
| C | -1.045358 | -1.629050 | -0.179336 |
| C | 1.338582  | -1.112896 | -0.322681 |
| O | 2.513149  | -1.376747 | 0.273502  |
| O | 1.253486  | -0.504137 | -1.362008 |
| C | 3.651841  | -0.809948 | -0.365303 |
| H | 0.405028  | -2.231953 | 1.300931  |
| H | -1.099802 | -1.388411 | -1.231426 |
| H | -1.815952 | -2.276072 | 0.216807  |
| H | 4.507732  | -1.097896 | 0.237120  |
| H | 3.752388  | -1.193120 | -1.379381 |
| H | 3.557855  | 0.274798  | -0.402400 |
| C | -4.183959 | -0.656417 | -0.296542 |
| H | -4.469693 | -0.624789 | 0.758448  |
| H | -3.868359 | -1.669055 | -0.555656 |
| H | -5.039681 | -0.381280 | -0.906644 |

Number of imaginary frequencies = 1 (-505.5637)  
ZPE Energy (M062X/def2TZVPP) = -691.210466  
Free Energy (M062X/def2TZVPP) = -691.252402

### TS-1+4-OPN

M062X/def2TZVPP geometry

|   |           |           |           |
|---|-----------|-----------|-----------|
| C | -1.914004 | 0.690459  | -0.149600 |
| C | -0.744442 | 0.889813  | -0.920118 |
| C | 0.350677  | 1.501333  | -0.406959 |
| C | -2.052805 | 1.165968  | 1.143468  |
| H | -3.001956 | 0.987607  | 1.629087  |
| O | -2.886545 | -0.141629 | -0.562889 |
| H | -0.624329 | 0.390913  | -1.869969 |
| H | 0.339411  | 2.076287  | 0.509425  |
| O | 1.490436  | 1.531375  | -1.104914 |
| H | -1.545382 | 2.075343  | 1.423839  |
| C | 0.447148  | -0.185755 | 1.734311  |
| C | -0.862723 | -0.143378 | 2.179219  |
| C | 0.801480  | -1.124915 | 0.702146  |
| O | 2.126719  | -1.099897 | 0.404158  |
| O | 0.031064  | -1.864326 | 0.117435  |
| C | 2.519778  | -1.945369 | -0.665938 |
| H | 1.232394  | 0.400249  | 2.188855  |
| H | -1.491349 | -0.992593 | 1.942562  |

|   |           |           |           |
|---|-----------|-----------|-----------|
| H | -1.071135 | 0.340407  | 3.124625  |
| H | 2.021573  | -1.648184 | -1.588781 |
| H | 3.595299  | -1.826756 | -0.764866 |
| H | 2.271272  | -2.983520 | -0.450832 |
| C | -2.627077 | -1.025067 | -1.643040 |
| H | -1.717325 | -1.596516 | -1.450958 |
| H | -2.546081 | -0.478379 | -2.584702 |
| H | -3.485124 | -1.689078 | -1.691393 |
| C | 2.616312  | 2.026194  | -0.397994 |
| H | 2.849856  | 1.365138  | 0.437795  |
| H | 2.428285  | 3.040431  | -0.038594 |
| H | 3.445143  | 2.038770  | -1.099391 |

Number of imaginary frequencies = 1 (-419.6554)  
ZPE Energy (M062X/def2TZVPP) = -691.220931  
Free Energy (M062X/def2TZVPP) = -691.263099

### TS-1+5-MPN

M062X/def2TZVPP geometry

|   |           |           |           |
|---|-----------|-----------|-----------|
| C | -1.130800 | 0.822638  | 0.563144  |
| C | 0.002258  | 0.826387  | 1.398073  |
| C | 0.484733  | -0.309364 | 1.979504  |
| C | -1.852289 | -0.351064 | 0.367883  |
| O | -1.469703 | 1.850183  | -0.237564 |
| H | 0.632997  | 1.703523  | 1.393599  |
| H | -0.132301 | -1.171546 | 2.176349  |
| H | 1.427914  | -0.284508 | 2.508192  |
| H | -1.906697 | -1.066329 | 1.178289  |
| C | 0.829407  | -1.550900 | -0.061829 |
| C | -0.403255 | -1.468771 | -0.682689 |
| C | 1.853407  | -0.588253 | -0.441386 |
| O | 3.078855  | -0.917164 | 0.018791  |
| O | 1.653531  | 0.418538  | -1.086624 |
| C | 4.112405  | 0.002078  | -0.304738 |
| H | 1.143236  | -2.424341 | 0.489282  |
| H | -0.510050 | -0.803497 | -1.529486 |
| H | -1.035826 | -2.346696 | -0.688707 |
| H | 4.200034  | 0.119037  | -1.383883 |
| H | 3.910087  | 0.978124  | 0.135863  |
| H | 5.026160  | -0.415643 | 0.107009  |
| C | -0.531355 | 2.895212  | -0.418342 |
| H | 0.426978  | 2.491835  | -0.751043 |
| H | -0.400743 | 3.469112  | 0.502172  |
| H | -0.952083 | 3.542054  | -1.182746 |
| O | -2.916804 | -0.322733 | -0.472436 |
| C | -3.786168 | -1.426956 | -0.354532 |
| H | -4.224862 | -1.472424 | 0.645963  |
| H | -4.575365 | -1.288784 | -1.087934 |
| H | -3.266583 | -2.366559 | -0.560795 |

Number of imaginary frequencies = 1 (-458.1449)  
ZPE Energy (M062X/def2TZVPP) = -691.206716  
Free Energy (M062X/def2TZVPP) = -691.248774

### TS-1+5-OMN

M062X/def2TZVPP geometry

|   |          |           |           |
|---|----------|-----------|-----------|
| C | 2.207119 | 0.107588  | -0.359433 |
| C | 0.982904 | 0.506893  | -0.912823 |
| C | 0.083082 | -0.432850 | -1.363149 |
| C | 2.575742 | -1.215298 | -0.208396 |
| H | 3.530296 | -1.428612 | 0.253175  |

|   |           |           |           |
|---|-----------|-----------|-----------|
| H | 2.788391  | 0.854011  | 0.163030  |
| O | 0.519784  | 1.784506  | -0.879607 |
| H | 0.401908  | -1.429447 | -1.630462 |
| H | 2.251040  | -1.962718 | -0.917848 |
| C | 1.224556  | 2.724639  | -0.094723 |
| H | 2.220376  | 2.913688  | -0.504610 |
| H | 1.298907  | 2.387315  | 0.940301  |
| H | 0.644879  | 3.642796  | -0.139213 |
| C | -0.034349 | -1.633279 | 0.883952  |
| C | 1.264718  | -1.936499 | 1.238759  |
| C | -0.609072 | -0.378466 | 1.342661  |
| O | -1.918406 | -0.266280 | 1.037032  |
| O | 0.004172  | 0.500207  | 1.910804  |
| C | -2.482009 | 1.018377  | 1.275258  |
| H | -0.691600 | -2.354415 | 0.421253  |
| H | 1.713560  | -1.349036 | 2.026584  |
| H | 1.606332  | -2.959430 | 1.155477  |
| H | -2.417169 | 1.277000  | 2.330788  |
| H | -1.954717 | 1.768667  | 0.686569  |
| H | -3.520303 | 0.952868  | 0.963390  |
| O | -1.127515 | -0.046543 | -1.781184 |
| C | -2.028150 | -1.098339 | -2.069028 |
| H | -2.900590 | -0.646672 | -2.532346 |
| H | -1.579322 | -1.814040 | -2.762849 |
| H | -2.323517 | -1.603695 | -1.148061 |

Number of imaginary frequencies = 1 (-459.1422)  
 ZPE Energy (M062X/def2TZVPP) = -691.210282  
 Free Energy (M062X/def2TZVPP) = -691.252122

#### P-1+2-MN

M062X/def2TZVPP geometry

|   |           |           |           |
|---|-----------|-----------|-----------|
| C | 1.733973  | 0.516770  | 1.074206  |
| C | 0.968174  | 1.596487  | 1.149979  |
| C | 0.173990  | 2.123338  | -0.009689 |
| C | 1.955290  | -0.278040 | -0.182594 |
| O | 1.871953  | -1.672027 | 0.065061  |
| C | 0.611127  | -2.149071 | 0.471961  |
| H | 2.279453  | 0.167119  | 1.944067  |
| H | 0.903689  | 2.139956  | 2.085578  |
| H | 0.745108  | 2.907434  | -0.516770 |
| H | -0.740995 | 2.592704  | 0.349728  |
| H | 3.003613  | -0.153250 | -0.464618 |
| H | -0.100789 | -2.169063 | -0.357891 |
| H | 0.196883  | -1.547043 | 1.288451  |
| H | 0.758680  | -3.167081 | 0.826730  |
| C | -0.150835 | 1.028193  | -1.021048 |
| C | 1.104694  | 0.208518  | -1.373121 |
| C | -1.306343 | 0.129338  | -0.628412 |
| O | -1.758979 | 0.329999  | 0.614209  |
| O | -1.787511 | -0.682293 | -1.373412 |
| C | -2.830090 | -0.521771 | 1.013503  |
| H | -0.496515 | 1.483447  | -1.951746 |
| H | 0.831415  | -0.648112 | -1.989626 |
| H | 1.734211  | 0.853339  | -1.988296 |
| H | -3.065758 | -0.247028 | 2.036490  |
| H | -3.692289 | -0.375873 | 0.365347  |
| H | -2.520289 | -1.564563 | 0.956987  |

Number of imaginary frequencies = 0  
 ZPE Energy (M062X/def2TZVPP) = -576.795747

Free Energy (M062X/def2TZVPP) = -576.834088

#### P-1+2-ON

M062X/def2TZVPP geometry

|   |           |           |           |
|---|-----------|-----------|-----------|
| C | 2.643107  | -0.100891 | 0.841872  |
| C | 1.618780  | 0.703963  | 1.086002  |
| C | 0.685971  | 1.034873  | -0.036292 |
| C | 2.769328  | -0.688579 | -0.533368 |
| O | -0.401587 | 1.768330  | 0.470594  |
| C | -1.106795 | 2.500801  | -0.504127 |
| H | 3.356896  | -0.357214 | 1.613565  |
| H | 1.423921  | 1.157065  | 2.048643  |
| H | 1.224874  | 1.652709  | -0.771420 |
| H | 3.514505  | -1.481987 | -0.562191 |
| H | 3.104331  | 0.081743  | -1.236997 |
| H | -1.589187 | 1.847822  | -1.235241 |
| H | -0.438371 | 3.195445  | -1.024790 |
| H | -1.873717 | 3.069658  | 0.016538  |
| C | 0.240276  | -0.254522 | -0.796608 |
| C | 1.407857  | -1.244692 | -0.985828 |
| C | -0.884445 | -0.881403 | 0.000677  |
| O | -2.088397 | -0.516468 | -0.465367 |
| O | -0.741570 | -1.604090 | 0.946755  |
| C | -3.196917 | -0.978049 | 0.302694  |
| H | -0.168625 | 0.049343  | -1.759036 |
| H | 1.199194  | -2.130266 | -0.387266 |
| H | 1.461879  | -1.555955 | -2.028565 |
| H | -4.085260 | -0.612543 | -0.202685 |
| H | -3.200796 | -2.065457 | 0.348411  |
| H | -3.140177 | -0.581537 | 1.315046  |

Number of imaginary frequencies = 0

ZPE Energy (M062X/def2TZVPP) = -576.793111  
 Free Energy (M062X/def2TZVPP) = -576.831889

#### P-1+3-MN

M062X/def2TZVPP geometry

|   |           |           |           |
|---|-----------|-----------|-----------|
| C | -2.251847 | 0.264481  | -0.520574 |
| C | -1.360760 | 0.901320  | 0.227095  |
| C | -0.631591 | 0.123800  | 1.288272  |
| C | -2.463574 | -1.196752 | -0.243665 |
| H | -3.078041 | -1.656424 | -1.015884 |
| H | -2.795166 | 0.782630  | -1.299099 |
| O | -1.101745 | 2.239050  | 0.088637  |
| H | -1.337611 | -0.150870 | 2.076572  |
| H | 0.157347  | 0.709751  | 1.754003  |
| H | -3.007569 | -1.319281 | 0.699397  |
| C | 0.205614  | 2.516067  | -0.380271 |
| H | 0.365806  | 2.055462  | -1.359027 |
| H | 0.968890  | 2.150519  | 0.314145  |
| H | 0.291408  | 3.596700  | -0.461552 |
| C | -0.062614 | -1.182329 | 0.681659  |
| C | -1.115844 | -1.937936 | -0.150492 |
| C | 1.155398  | -0.818190 | -0.147061 |
| O | 2.153035  | -0.374127 | 0.637780  |
| O | 1.252285  | -0.877063 | -1.341373 |
| C | 3.329561  | 0.042672  | -0.049698 |
| H | 0.304461  | -1.797861 | 1.503870  |
| H | -0.723554 | -2.067091 | -1.157696 |
| H | -1.274244 | -2.931093 | 0.269640  |
| H | 3.754363  | -0.786281 | -0.613097 |

|   |          |          |           |
|---|----------|----------|-----------|
| H | 3.098151 | 0.853466 | -0.739530 |
| H | 4.021095 | 0.378705 | 0.716310  |

Number of imaginary frequencies = 0  
ZPE Energy (M062X/def2TZVPP) = -576.797264  
Free Energy (M062X/def2TZVPP) = -576.836300

#### P-1+3-PN

M062X/def2TZVPP geometry

|   |           |           |           |
|---|-----------|-----------|-----------|
| C | -1.645420 | -0.117918 | -0.085090 |
| C | -1.159098 | 0.358116  | 1.063105  |
| C | 0.056130  | -0.229150 | 1.729105  |
| C | -1.058143 | -1.277805 | -0.831163 |
| H | -0.631253 | -0.904868 | -1.764044 |
| O | -2.722382 | 0.376048  | -0.748271 |
| H | -1.637561 | 1.189060  | 1.561876  |
| H | -0.241591 | -0.872195 | 2.562972  |
| H | 0.666736  | 0.565498  | 2.155589  |
| H | -1.873046 | -1.949282 | -1.106966 |
| C | 0.893456  | -1.058761 | 0.754315  |
| C | -0.000672 | -2.022746 | -0.020490 |
| C | 1.701153  | -0.197955 | -0.200037 |
| O | 2.307893  | 0.820965  | 0.425196  |
| O | 1.836936  | -0.409271 | -1.374811 |
| C | 3.115186  | 1.650979  | -0.405674 |
| H | 1.636992  | -1.622978 | 1.325482  |
| H | 0.597010  | -2.647467 | -0.682171 |
| H | -0.488045 | -2.677509 | 0.704927  |
| H | 3.904724  | 1.066353  | -0.874561 |
| H | 2.508013  | 2.110051  | -1.183848 |
| H | 3.535892  | 2.408234  | 0.248016  |
| C | -3.360958 | 1.503152  | -0.198170 |
| H | -2.668823 | 2.345785  | -0.120627 |
| H | -3.764695 | 1.281755  | 0.793375  |
| H | -4.173717 | 1.758156  | -0.872351 |

Number of imaginary frequencies = 0  
ZPE Energy (M062X/def2TZVPP) = -576.811900  
Free Energy (M062X/def2TZVPP) = -576.850089

#### P-1+4-OPN

M062X/def2TZVPP geometry

|   |           |           |           |
|---|-----------|-----------|-----------|
| C | 2.147277  | -0.019721 | 0.197330  |
| C | 1.222196  | -0.773603 | -0.393880 |
| C | -0.009874 | -1.094108 | 0.395750  |
| C | 1.882718  | 0.499265  | 1.575954  |
| H | 2.627646  | 1.250721  | 1.831866  |
| O | 3.331426  | 0.374924  | -0.319102 |
| H | 1.296441  | -1.181707 | -1.389743 |
| H | 0.243671  | -1.766911 | 1.229810  |
| O | -0.919006 | -1.753603 | -0.452906 |
| H | 1.977650  | -0.315944 | 2.299383  |
| C | -0.621226 | 0.188558  | 1.045677  |
| C | 0.471003  | 1.102963  | 1.637774  |
| C | -1.412768 | 0.908196  | -0.025561 |
| O | -2.712298 | 0.575677  | 0.008885  |
| O | -0.956063 | 1.672763  | -0.829180 |
| C | -3.504047 | 1.125962  | -1.040424 |
| H | -1.322747 | -0.126740 | 1.816890  |
| H | 0.484999  | 2.028973  | 1.064984  |
| H | 0.225223  | 1.355043  | 2.668575  |

|   |           |           |           |
|---|-----------|-----------|-----------|
| H | -3.133735 | 0.785032  | -2.005774 |
| H | -4.515410 | 0.769963  | -0.871147 |
| H | -3.469722 | 2.213489  | -1.011866 |
| C | 3.601201  | -0.043097 | -1.639038 |
| H | 2.840139  | 0.335780  | -2.325348 |
| H | 3.629020  | -1.133925 | -1.702154 |
| H | 4.572674  | 0.365080  | -1.902203 |
| C | -1.918351 | -2.477731 | 0.224859  |
| H | -2.587475 | -1.822635 | 0.788052  |
| H | -1.471927 | -3.210048 | 0.906597  |
| H | -2.497700 | -3.004369 | -0.530140 |

Number of imaginary frequencies = 0  
ZPE Energy (M062X/def2TZVPP) = -691.291760  
Free Energy (M062X/def2TZVPP) = -691.333609

#### P-1+5-MPN

M062X/def2TZVPP geometry

|   |           |           |           |
|---|-----------|-----------|-----------|
| C | -1.054739 | 0.905907  | 0.320059  |
| C | 0.014918  | 1.233782  | 1.050063  |
| C | 0.715559  | 0.134826  | 1.800320  |
| C | -1.570443 | -0.513495 | 0.384549  |
| O | -1.799704 | 1.722883  | -0.442289 |
| H | 0.397738  | 2.241737  | 1.095957  |
| H | 0.127418  | -0.204941 | 2.659684  |
| H | 1.673653  | 0.475413  | 2.183387  |
| H | -2.059810 | -0.619689 | 1.366583  |
| C | 0.912842  | -1.059984 | 0.851012  |
| C | -0.429137 | -1.555395 | 0.302791  |
| C | 1.854678  | -0.671808 | -0.277660 |
| O | 2.980114  | -0.114043 | 0.196158  |
| O | 1.667134  | -0.853665 | -1.448132 |
| C | 3.933941  | 0.261926  | -0.792865 |
| H | 1.419391  | -1.866034 | 1.387760  |
| H | -0.313697 | -1.824210 | -0.747093 |
| H | -0.735825 | -2.448827 | 0.846371  |
| H | 4.252456  | -0.608775 | -1.363461 |
| H | 3.502158  | 0.990579  | -1.476745 |
| H | 4.771300  | 0.693160  | -0.253399 |
| C | -1.372944 | 3.062090  | -0.524407 |
| H | -0.355697 | 3.121278  | -0.920595 |
| H | -1.402947 | 3.542757  | 0.457356  |
| H | -2.060276 | 3.563510  | -1.199399 |
| O | -2.530429 | -0.712607 | -0.617210 |
| C | -3.241512 | -1.915187 | -0.478889 |
| H | -3.671623 | -2.006417 | 0.525992  |
| H | -4.047581 | -1.896487 | -1.208673 |
| H | -2.612561 | -2.789573 | -0.671783 |

Number of imaginary frequencies = 0  
ZPE Energy (M062X/def2TZVPP) = -691.285835  
Free Energy (M062X/def2TZVPP) = -691.328271

#### P-1+5-OMN

M062X/def2TZVPP geometry

|   |           |           |           |
|---|-----------|-----------|-----------|
| C | -2.290488 | -0.791012 | -0.056664 |
| C | -1.549325 | 0.310769  | 0.068326  |
| C | -0.359377 | 0.255312  | 0.997315  |
| C | -1.825314 | -2.018517 | 0.674460  |
| H | -2.387427 | -2.893664 | 0.351910  |
| H | -3.163977 | -0.833327 | -0.688999 |



|   |           |           |           |
|---|-----------|-----------|-----------|
| O | -1.732586 | 1.502699  | -0.524245 |
| H | -0.740184 | 0.104345  | 2.018144  |
| H | -1.998023 | -1.922765 | 1.752640  |
| C | -2.793341 | 1.573587  | -1.448099 |
| H | -3.753065 | 1.393478  | -0.955873 |
| H | -2.656350 | 0.840069  | -2.246546 |
| H | -2.776544 | 2.577914  | -1.861093 |
| C | 0.522007  | -0.988440 | 0.664826  |
| C | -0.328119 | -2.249042 | 0.412698  |
| C | 1.350885  | -0.618583 | -0.547007 |
| O | 2.581386  | -0.211956 | -0.203293 |
| O | 0.964072  | -0.652447 | -1.681835 |
| C | 3.380263  | 0.271366  | -1.280320 |
| H | 1.204042  | -1.140795 | 1.499747  |
| H | -0.214979 | -2.534717 | -0.632227 |
| H | 0.040400  | -3.071930 | 1.025038  |
| H | 3.531137  | -0.510238 | -2.022632 |
| H | 2.891954  | 1.120867  | -1.754746 |
| H | 4.326973  | 0.569396  | -0.840954 |
| O | 0.362177  | 1.451405  | 0.939937  |
| C | 1.219021  | 1.654796  | 2.037826  |
| H | 1.634570  | 2.654394  | 1.934259  |
| H | 0.664123  | 1.594818  | 2.980677  |
| H | 2.039691  | 0.933117  | 2.055975  |

Number of imaginary frequencies = 0

ZPE Energy (M062X/def2TZVPP) = -691.285274

Free Energy (M062X/def2TZVPP) = -691.327317
